# Supplementary material for: Diets of the Barents Sea cod from the 1930s to the present day
Source: Copernicus journal article supplement (doi:10.5194/essd-2020-96), 2020-07-13
Supplement: Supplementary file 1 [file Townhill et al_Supplementary Material_1_Prey Category Information Sheet.docx]

**Supplementary Material 1: Prey Category Information**

Prey categorisations used for both IMR-PINRO and CEFAS data (Please note: These are the prey categories chosen for data analysis associated with the CoDINA: Cod: DIet and food web dyNAmics RCN project (No: 255460), prey categories can be changed for your own analyses and research purpose).

| **Scientific Name** | **Prey Category** |
| --- | --- |
| ABERRANTIDAE | Other food |
| ACANTHOCEPHALA | Other food |
| ACANTHOCHITONA CRINATA | Other food |
| ACARTIA CLAUSI | Other food |
| ACTINIARIA | Other food |
| ACTINIIDAE | Other food |
| ADAMSIA PALLIATA | Other food |
| AEGA PSORA | Other food |
| AEGIDAE | Other food |
| AEOLIDIA SPP | Other food |
| AETIDEOPSIS ARMATA | Other food |
| AGLANTHA DIGITALE | Other food |
| AGONIDAE | Other fish |
| AGONONIDA LONGIPES | Other food |
| AGONUS | Other fish |
| AGONUS CATAPHRACTUS | Other fish |
| ALOSA | Herring |
| AMBLYRAJA RADIATA | Other food |
| AMMODYTES | Other fish |
| AMMODYTES MARINUS | Other fish |
| AMMODYTES SPP | Other fish |
| AMMODYTIDAE | Other fish |
| AMMODYTOIDEI | Other fish |
| AMPELISCA | Other food |
| AMPELISCA SPP | Other food |
| AMPELISCIDAE | Other food |
| AMPHARETIDAE | Other food |
| AMPHIPODA | Other food |
| AMPHOGONA APICATA | Other food |
| ANAITIDES | Other food |
| ANAITIDES (PHYLLODOCE) GROENLANDICA | Other food |
| ANAITIDES (PHYLLODOCE) MACULATA | Other food |
| ANARHICHADIDAE | Other fish |
| ANARHICHAS | Other fish |
| ANARHICHAS DENTICULATUS | Other fish |
| ANARHICHAS DENTICULATUS(LATIFRONS) | Other fish |
| ANARHICHAS LUPUS | Other fish |
| ANARHICHAS MINOR | Other fish |
| ANARHICHAS SPP | Other fish |
| ANGUILLIDAE | Other fish |
| ANNELIDA | Other fish |
| ANOMURA | Other food |
| ANONYX | Other food |
| ANONYX NUGAX | Other food |
| ANTHOZOA | Other food |
| ANTHOZOA | Other food |
| ANTHURIDAE | Other food |
| ARENICOLA MARINA | Other food |
| APHRODITA ACULEATA | Other food |
| APHRODITE ACULEATA | Other food |
| APHRODITIDAE | Other food |
| APPENDICULARIA | Other food |
| ARCA | Other food |
| ARCHAEOGASTROPODA | Other food |
| ARCTINULA | Other food |
| ARCTOGADUS | Polar cod |
| ARCTOZENUS RISSO | Other fish |
| ARCTURIDAE | Other food |
| ARGENTINA | Other fish |
| ARGENTINA SILUS | Other fish |
| ARGENTINA SPHYRAENA | Other fish |
| ARGENTINIDAE | Other fish |
| ARGYROPELECUS HEMIGYMNUS | Other fish |
| ARTEDIELLUS | Other fish |
| ARTEDIELLUS ATLANTICUS | Other fish |
| ARTEDIELLUS ATLANTICUS EUROPAEUS | Other fish |
| ARTEDIELLUS UNCINATUS | Other fish |
| ASCIDIACEA | Other food |
| ASPIDOCHIROTIDA | Other food |
| ASPITRIGLA CUCULUS | Other fish |
| ASTACOIDEA | Other food |
| ASTARTE | Other food |
| ASTARTE (TRIDONTA) BOREALIS | Other food |
| ASTARTE (TRIDONTA) MONTAGUI | Other food |
| ASTARTE CRENATA | Other food |
| ASTARTE SULCATA | Other food |
| ASTERIAS RUBENS | Other food |
| ASTEROIDEA | Other food |
| ASTEROIDEA | Other food |
| ASTROPECTINIDAE | Other food |
| ATELECYCLUS ROTUNDATUS | Other food |
| ATLANTOPANDALUS PROPINQVUS | Euphausiids |
| AURELIA AURITA | Other food |
| AVES | Other food |
| BALANIDAE | Other food |
| BALANOGLOSSUS CLAVIGERUS | Other food |
| BALANOMORPHA | Other food |
| BATHYARCA GLACIALIS | Other food |
| BATHYPOLYPUS ARCTICUS | Other food |
| BATHYRAJA SPINICAUDA | Other food |
| BELONE BELONE | Other fish |
| BENTHOS | Other food |
| BENTHOSEMA GLACIALE | Other fish |
| BEROE(HORMIPHORA) CUCUMIS | Other food |
| BEROIDAE | Other food |
| BIVALVIA | Other food |
| BOLINOPSIS VITREA | Other food |
| BOREOGADUS SAIDA | Polar cod |
| BRACHIOPODA | Other food |
| BRACHYRHYNCHA | Other food |
| BRACHYURA | Other food |
| BRACHYURA-CANCRIDEA | Other food |
| BRADA | Other food |
| BRADA INHABILIS | Other food |
| BRADYIDIUS SIMILIS | Other food |
| BROSME BROSME | Other fish |
| BRYOZOA | Other food |
| BUCCINIDAE | Other food |
| BUCCINUM | Other food |
| BUCCINUM UNDATUM | Other food |
| BYBLIS | Other food |
| BYBLIS GAIMARDI | Other food |
| CALANIDAE | Other food |
| CALANOIDA | Other food |
| CALANUS | Other food |
| CALANUS FINMARCHICUS | Other food |
| CALANUS GLACIALIS | Other food |
| CALANUS HYPERBOREUS | Other food |
| CALANUS SPP (ADULT) | Other food |
| CALANUS SPP (EGGS) | Other food |
| CALANUS SPP (NAUPLII) | Other food |
| CALIGUS | Other food |
| CALIGUS SPP | Other food |
| CALLIANASSIDAE | Shrimp |
| CALLIONYMIDAE | Other fish |
| CALLIOPIIDAE | Hyperiids |
| CAMPANULARIIDAE | Other food |
| CANCER PAGURUS | Other food |
| CANCRIDAE | Other food |
| CANIFORMIA | Other food |
| CAPRELLA | Euphausiids |
| CAPRELLA LINEARIS | Euphausiids |
| CAPRELLA MONOCERA | Other food |
| CAPRELLIDAE | Euphausiids |
| CAPRELLIDEA | Euphausiids |
| CARDIDAE | Other food |
| CARDIUM | Other food |
| CAREPROCTUS | Other fish |
| CAREPROCTUS REINHARDTI | Other fish |
| CARIDEA | Shrimp |
| CEPHALOCHORDATA | Other fish |
| CEPHALOPODA | Other food |
| CEPHALOPODA-SEPIIDA | Other food |
| CERAMASTER GRANULARIS | Other food |
| CERIANTHUS LLOYDII | Other food |
| CESTODA | Other food |
| CHACEON AFFINIS | Other food |
| CHAETOGNATHA | Other food |
| CHAETOPTERUS VARIOPEDATUS | Other food |
| CHELICERATA | Other food |
| CHIONOECETES OPILIO | Snow crab |
| CHIRIDIUS ARMATUS | Other food |
| CHLAMYS | Other food |
| CHLAMYS ISLANDICA | Other food |
| CHLAMYS OPERCULARIS | Other food |
| CHLAMYS VARIA | Other food |
| CHLOROPHYTA | Other food |
| CHRYSOPHYTA | Other food |
| CILIATA SEPTENTRIONALIS | Other fish |
| CIROLANA BOREALIS | Other food |
| CIROLANIDAE | Other food |
| CIRREPEDIA | Other food |
| CIRREPEDIA (LARVAE) | Other food |
| CIRRIPEDIA | Other food |
| CLADOCERA | Other food |
| CLIONE LIMACINA | Other food |
| CLIONIDAE | Other food |
| CLUPEA HARENGUS | Herring |
| CLUPEIDAE | Other fish |
| CLUPEIDAE (EGGS) | Other fish |
| CLUPEIFORMES | Herring |
| CNIDARIA | Other food |
| COLEOIDEA | Other food |
| COLUS | Other food |
| CONCHOECIA | Other food |
| COPEPODA | Other food |
| COPEPODA-CALANOIDA | Other food |
| COPEPODA-CALANOIDA (EGGS) | Other food |
| COROPHIIDAE | Hyperiids |
| CORALLINA OFFICINALIS | Other food |
| CORYSTES CASSIVELAUNUS | Other food |
| COTTIDAE | Other fish |
| COTTUNCULUS MICROPS | Other fish |
| COTTUNCULUS SADKO | Other fish |
| COTTUS | Other fish |
| COTTUS GOBIO | Other fish |
| CRANGON | Shrimp |
| CRANGON ALLMANNI | Shrimp |
| CRANGON CRANGON | Shrimp |
| CRANGONIDAE | Shrimp |
| CRINOIDEA | Other food |
| CRUSTACEA | Other food |
| CRYPTONISCIDAE | Other food |
| CTENODISCUS CRISPATUS | Other food |
| CTENODISCUS SPP | Other food |
| CTENOPHORA | Other food |
| CUCUMARIA | Other food |
| CUCUMARIA FRONDOSA | Other food |
| CUCUMARIIDAE | Other food |
| CUMACEA | Other food |
| CUMIDAE | Other food |
| CYAMIDAE | Other food |
| CYCLOPOIDA | Other food |
| CYCLOPTERIDAE | Other fish |
| CYCLOPTERUS | Other fish |
| CYCLOPTERUS LUMPUS | Other fish |
| CYLICHNA ALBA | Other food |
| DECAPODA | Other food |
| DECAPODA REPTANTIA | Other food |
| DELECTOPECTEN GREENLANDICUS | Other food |
| DENDROBRANCHIATA | Euphausiids |
| DENDRONOTIDAE | Other food |
| DENTALIUM ENTALE | Other food |
| DIASTYLIDAE | Other food |
| DIASTYLIS | Other food |
| DIGESTED REMAINS | NA |
| DIPLOCIRRUS HIRSUTUS | Other food |
| ECHINODERMATA | Other food |
| ECHINOIDEA | Other food |
| ECHINUS ACUTUS | Other food |
| ECHINUS ESCULENTUS | Other food |
| ECHIURA | Other food |
| ECHIURIDAE | Other food |
| ECHIURUS ECHIURUS | Other food |
| ECTOPROCTA | Other food |
| ECTOPROCTA/ BRYOZOA | Other food |
| ELEGINUS NAWAGA | Codfishes |
| ELOPOMORPHAA | Other fish |
| EMPTY | Empty |
| ENCHELYOPUS CIMBRIUS | Other fish |
| ENTELURUS AEQUOREUS | Other fish |
| ENTEROGONA | Other food |
| EPICARIDEA | Other food |
| EPIZOANTHIDAE | Other food |
| ERYTHROPS ELEGANS | Other food |
| ERYTHROPS ERYTHROPHTHALMA | Other food |
| EUALUS GAIMARDII | Euphausiids |
| EUCARIDA | Euphausiids |
| EUCHAETA | Other food |
| EUCHAETA NORVEGICA | Other food |
| EUCHAETIDAE | Other food |
| EUCOPIIDAE | Other food |
| EUMICROTREMUS | Other fish |
| EUMICROTREMUS SPINOSUS | Other fish |
| EUNICIDAE | Other food |
| EUNOE SPP | Butterfly |
| EUPAGURUS BERNHARDUS | Other food |
| EUPHAUSIA | Euphausiids |
| EUPHAUSIACEA | Euphausiids |
| EUPHAUSIIDAE | Euphausiids |
| EURYDICE PULCHRA | Other food |
| EUSIRIDAE | Hyperiids |
| EVADNE NORDMANNI | Other food |
| FEATHER | Other food |
| FISH EGGS | Other fish |
| FISH LARVAE | Other fish |
| FLABELLIFERA | Other food |
| FORAMINIFERA | Other food |
| FORAMINIFERIDA | Other food |
| FUCALES | Other food |
| FUCUS | Other food |
| GADICULUS ARGENTEUS | Codfishes |
| GADIDAE | Cod |
| GADIFORMES | Cod |
| GADUS | Cod |
| GADUS MORHUA | Cod |
| GAIDROPSARUS | Other fish |
| GAIDROPSARUS VULGARIS | Other fish |
| GALATHEA | Other food |
| GALATHEA SPP | Other food |
| GALATHEIDAE | Other food |
| GAMMARIDAE | Hyperiids |
| GAMMARIDEA | Euphausiids |
| GAMMARUS | Hyperiids |
| GAMMARUS LOCUSTA | Hyperiids |
| GAMMARUS WILKITZKII | Hyperiids |
| GASTEROSTEUS ACULEATUS | Other fish |
| GASTROPODA | Other food |
| GERYON | Other food |
| GERYON AFFINIS | Other food |
| GERYON TRISPINOSUS | Other food |
| GERYONIDAE | Other food |
| GIBBULA | Other food |
| GLYCERA SPP | Other food |
| GLYPTOCEPHALUS | Flatfish |
| GLYPTOCEPHALUS CYNOGLOSSUS | Flatfish |
| GNATHOSTOMATA | Other fish |
| GNATHOSTOMULIDA | Other food |
| GOBIIDAE | Other fish |
| GOBIUS | Other fish |
| GOBIUS SPP | Other fish |
| GOLFINGIA MARGARITACEA | Other food |
| GOLFINGIA VULGARIS | Other food |
| GONATIDAE | Other food |
| GONATUS | Other food |
| GONATUS FABRICII | Other food |
| GORGONACEA | Other food |
| GUT EVERTED/REGURGITATED | Gut everted/regurgitated |
| GYMNAMMODYTES | Other fish |
| GYMNELUS | Other fish |
| GYMNELUS BARSUKOVI | Other fish |
| GYMNELUS RETRODORSALIS | Other fish |
| GYMNOCANTHUS TRICUSPIS | Other fish |
| GYMNOSOMATA | Other food |
| HAMINGIA ARCTICA | Other food |
| HAPTOPHYTA | Other food |
| HARMOTHOE IMPAR | Other food |
| HAUSTORIIDAE | Hyperiids |
| HEMIARTHRUS SPP | Other food |
| HENRICIA | Other food |
| HENRICIA OCULATA | Other food |
| HETAIRUS POLARIS | Euphausiids |
| HEXANCHIFORMES | Other food |
| HIPPOGLOSSOIDES | Flatfish |
| HIPPOGLOSSOIDES PLATESSOIDES | Long rough dab |
| HIPPOGLOSSUS | Flatfish |
| HIPPOGLOSSUS HIPPOGLOSSUS | Flatfish |
| HIPPOLYTE VARIANS | Shrimp |
| HIPPOLYTIDAE | Shrimp |
| HOLOTHUROIDEA | Other food |
| HOMARUS GAMMARUS | Other food |
| HOPLOCARIDA | Shrimp |
| HORMATHIA | Other food |
| HORMATHIA DIGITATA | Other food |
| HORMATHIA NODOSA | Other food |
| HORMATHIIDAE | Other food |
| HYALIDAE | Hyperiids |
| HYAS | Other food |
| HYAS ARANEUS | Other food |
| HYAS COARCTATUS | Other food |
| HYAS COARCTATUSS | Other food |
| HYDROIDA (order) | Other food |
| HYDROIDOLINA | Other food |
| HYDROZOA | Other food |
| HYPERIA | Other food |
| HYPERIA GALBA | Other food |
| HYPERIIDAE | Hyperiids |
| HYPERIIDEA | Hyperiids |
| ICELUS | Other fish |
| ICELUS BICORNIS | Other fish |
| ICELUS SPATULA | Other fish |
| IDOTEA | Other food |
| IDOTEA BALTHICA | Other food |
| IDOTEIDAE | Other food |
| INACHUS | Other food |
| INDETERMINATUS | NA |
| INSECT IV (DIPTERA) | Other food |
| ISOPODA | Other food |
| ISOPOD (SPHAEROMATIDAE) | Other food |
| KINORHYNCHA | Other food |
| LAMPROPIDAE | Other food |
| LEBBEUS POLARIS | Shrimp |
| LENSIA CONOIDEA | Other food |
| LEPIDONOTUS SQUAMATUS | Other food |
| LEPTAGONUS DECAGONUS | Other fish |
| LEPTOCLINUS | Other fish |
| LEPTOCLINUS MACULATUS | Other fish |
| LETHENTERON CAMTSCHATICUM | Other fish |
| LETHENTERON JAPONICUM | Other fish |
| LEUCOSIIDAE | Other food |
| LIMACINA | Other food |
| LIMACINA HELICINA | Other food |
| LIMACINA RETROVERSA | Other food |
| LIMACINIDAE | Other food |
| LIMANDA | Flatfish |
| LIMANDA LIMANDA | Flatfish |
| LIPARIDAE | Small arctic fish |
| LIPARIS | Small arctic fish |
| LIPARIS FABRICII | Small arctic fish |
| LIPARIS LIPARIS | Small arctic fish |
| LIPARIS SPP | Other fish |
| LIPARISCUS | Small arctic fish |
| LITHODES | Other food |
| LITHODES MAJA | Other food |
| LITHODIDAE | Other food |
| LITTORINA SPP | Other food |
| LOLIGINIDAE | Other food |
| LOLIGO SPP | Other food |
| LOPHIUS PISCATORIUS | Other fish |
| LUMBRINERIDAE | Other food |
| LUMBRINERIS FRAGILIS | Other food |
| LUMBRINERIS SPP | Other food |
| LUMPENUS | Other fish |
| LUMPENUS FABRICII | Other fish |
| LUMPENUS LAMPRETAEFORMIS | Other fish |
| LYCAEIDAE | Other fish |
| LYCENCHELYS | Other fish |
| LYCENCHELYS SARSI | Other fish |
| LYCODES | Other fish |
| LYCODES ESMARKII | Other fish |
| LYCODES EUDIPLEUROSTICTUS | Other fish |
| LYCODES GRACILIS | Other fish |
| LYCODES PALLIDUS | Other fish |
| LYCODES POLARIS | Other fish |
| LYCODES RETICULATUS | Other fish |
| LYCODES ROSSI | Other fish |
| LYCODES SEMINUDUS | Other fish |
| LYCODES VAHLII | Other fish |
| LYSIANASSIDAE | Other food |
| MACOMA | Other food |
| MACROPIPUS | Other food |
| MACROURIDAE | Other food |
| MACROURUS BERGLAX | Other food |
| MAERA LOVENI | Hyperiids |
| MAGNOLIOPHYTA | Other food |
| MAJIDAE | Other food |
| MALACOSTRACA | Other food |
| MALDANIDAE | Other food |
| MALLOTUS VILLOSUS | Capelin |
| MARGARITES GROENLANDICUS | Other food |
| MAUROLICUS MUELLERI | Other fish |
| MEGANYCTIPHANES NORVEGICA | Euphausiids |
| MELANOGRAMMUS | Haddock |
| MELANOGRAMMUS AEGLEFINUS | Haddock |
| MERLANGIUS MERLANGUS | Codfishes |
| MERLUCCIIDAE | Codfishes |
| MESOGASTROPODA | Other food |
| METRIDIA | Other food |
| METRIDIA LONGA | Other food |
| METRIDIA LUCENS | Other food |
| METRIDIIDAE | Other food |
| METRIDIUM SENILE | Other food |
| MICRENOPHRYS LILLJEBORGI | Other fish |
| MICROMESISTIUS POUTASSOU | Blue whiting |
| MICROSTOMUS KITT | Flatfish |
| MOLLUSC (LARVAE) | Other food |
| MOLLUSCA | Other food |
| MOLPADIA BOREALIS | Other food |
| MUNIDA | Other food |
| MUNIDA LONGIPES | Other food |
| MUNIDA SARSI | Other food |
| MUNNOPSIS TYPICA | Other food |
| MYA | Other food |
| MYA ARENARIA | Other food |
| MYA SPP | Other food |
| MYA TRUNCATA | Other food |
| MYCTOPHIDAE | Other fish |
| MYCTOPHIFORMES | Other fish |
| MYCTOPHUM PUNCTATUM | Other fish |
| MYIDAE | Other food |
| MYOPSINA | Other food |
| MYOXOCEPHALUS | Other fish |
| MYOXOCEPHALUS SCORPIUS | Other fish |
| MYOXOCEPHALUS SPP | Other fish |
| MYSIDA | Euphausiids |
| MYSIDAE | Euphausiids |
| MYSIS | Other food |
| MYSIS MIXTA | Other food |
| MYTILUS EDULIS | Other food |
| MYXINE GLUTINOSA | Other fish |
| NA | NA |
| NATICA SPP | Other food |
| N-DORIDOIDEA | Other food |
| NEBALIA BIPES | Other food |
| NEMATA | Other food |
| NEMATODA | Other food |
| NEMERTEA | Other food |
| NEMERTEA (LARVAE) | Other food |
| NEOGASTROPODA | Other food |
| NEPHROPS NORVEGICUS | Other food |
| NEPHTYIDAE | Other food |
| NEPHTYS | Other food |
| NEPHTYS CAECA | Other food |
| NEPTUNEA | Other food |
| NEREIDAE | Other food |
| NEREIDIDAE | Other food |
| NEREIS | Other food |
| NEREIS SPP | Other food |
| NEROPHIS OPHIDION | Other fish |
| NUCULA SPP | Other food |
| NUCULOIDA | Other food |
| NUCULOIDEA | Other food |
| NUDIBRANCHIA | Other food |
| NYMPHONIDAE | Other food |
| OCTOCORALLIA | Other food |
| OCTOPODA | Other food |
| OCTOPODIDAE | Other food |
| OCTOPUS VULGARIS | Other food |
| OEGOPSINA | Other food |
| OIKOPLEURA | Other food |
| OIKOPLEURA SPP | Other food |
| OIKOPLEURIDAE | Other food |
| OITHONA HELGOLANDICA | Other food |
| OMMASTREPHES SAGITTATUS | Other food |
| OMMASTREPHIDAE | Other food |
| ONCHNESOMA SQUAMATUM | Other food |
| ONUPHIDAE | Other food |
| OPHIOCTEN SERICEUM | Other food |
| OPHIOLEPIDIDAE | Other food |
| OPHIOPHOLIS ACULEATA | Other food |
| OPHIOPLEURA BOREALIS | Other food |
| OPHIOSCOLEX GLACIALIS | Other food |
| OPHIOTHRIX FRAGILIS | Other food |
| OPHIURA | Other food |
| OPHIURA ROBUSTA | Other food |
| OPHIURA SARSI | Other food |
| OPHIURA SPP | Other food |
| OPHIURIDA | Other food |
| OPHIURIDA (ORDER) | Other food |
| OPHIURIDAE | Other food |
| OPHIUROIDEA | Other food |
| ORBINIIDAE | Other food |
| ORTHONECTIDA | Other food |
| OSMERIDAE | Other fish |
| OSMERUS EPERLANUS | Other fish |
| OSTEICHTHYES | Other fish |
| OSTEICHTHYS – TELEOSTEI | Other fish |
| OSTRACODA | Other food |
| OSTREOIDA | Other food |
| OXYRHYNCHA | Other food |
| PAGURIDAE | Other food |
| PAGURUS | Other food |
| PAGURUS BERNHARDUS | Other food |
| PAGURUS PUBESCENS | Other food |
| PALAEMONIDAE | Shrimp |
| PANDALIDAE | Shrimp |
| PANDALINA BREVIROSTRIS | Euphausiids |
| PANDALUS | Shrimp |
| PANDALUS BOREALIS | Shrimp |
| PANDALUS MONTAGUI | Shrimp |
| PANDALUS PROPINQUUS | Shrimp |
| PANDALUS SPP | Shrimp |
| PANTOPODA | Other food |
| PARAEUCHAETA NORVEGICA | Other food |
| PARALEPIDIDAE | Other food |
| PARALEPIS (NOTOLEPIS) RISSOI | Other fish |
| PARALITHODES CAMTSCHATICUS | Other food |
| PARATHEMISTO ABYSSORUM | Hyperiids |
| PARATHEMISTO COMPRESSA | Hyperiids |
| PARATHEMISTO OBLIVIA | Hyperiids |
| PASIPHAEA | Euphausiids |
| PASIPHAEA MULTIDENTATA | Shrimp |
| PASIPHAEA SIVADO | Shrimp |
| PASIPHAEIDAE | Euphausiids |
| PATELLIDAE | Other food |
| PAUROPODA | Other food |
| PECTEN | Other food |
| PECTINARIA | Other food |
| PECTINIDAE | Other food |
| PENAEOIDEA | Euphausiids |
| PENTAMERA CALCIGERA | Other food |
| PERCARIDA-ISOPODA | Other food |
| PETROMYZON MARINUS | Other fish |
| PETROMYZONTIDAE | Other fish |
| PHAEOPHYCEAE | Other food |
| PHAEOPHYTA | Other food |
| PHASCOLION STROMBI | Other food |
| PHYLLODOCIDAE | Other food |
| PLASTIC RUBBISH | NA |
| PLATYHELMINTHES | Other food |
| PLEUROBRACHIA PILEUS | Other food |
| PLEURONECTES | Flatfish |
| PLEURONECTES PLATESSA | Flatfish |
| PLEURONECTIDAE | Flatfish |
| PLEURONECTIFORMES | Flatfish |
| PLEURONECTOIDEI | Flatfish |
| POLLACHIUS | Other fish |
| POLLACHIUS VIRENS | Other fish |
| POLYCHAETA | Other food |
| POLYCHAETA | Other food |
| POLYNOIDAE | Other food |
| POLYPHYSIA CRASSA | Other food |
| POLYPLACOPHORA | Other food |
| PONTOPHILUS | Euphausiids |
| PONTOPHILUS NORVEGICUS | Euphausiids |
| PONTOPHILUS SPINOSUS | Euphausiids |
| PORIFERA | Other food |
| PORTLANDIA ARCTICA | Other food |
| PORTLANDIA INTERMEDIA | Other food |
| PRAUNUS FLEXUOSUS | Shrimp |
| PRAUNUS INERMIS | Shrimp |
| PRIAPULA | Other food |
| PRIAPULIDAE | Other food |
| PRIAPULIS CAUDATUS | Other food |
| PRIAPULOPSIS BICAUDATUS | Other food |
| PRIAPULUS CAUDATUS | Other food |
| PROCESSIDAE | Shrimp |
| PROTOZOA | Other food |
| PSETTA MAXIMA | Flatfish |
| PSEUDOCALANUS MINUTUS | Shrimp |
| PSILASTER ANDROMEDA | Other food |
| PSOLUS PHANTAPUS | Other food |
| PTERIINA | Other food |
| PYCNOGONIDA | Other food |
| PYCNOGONIDAE | Other food |
| PYCNOGONUM LITTORALE | Other food |
| RAJA | Other food |
| RAJA RADIATA | Other food |
| RAJA SPP | Other food |
| RAJA SPP (EGGS) | Other food |
| RAJELLA FYLLAE | Other food |
| RAJIDAE | Other food |
| RAJIFORMES | Other food |
| RANICEPS RANINUS | Other fish |
| REINHARDTIUS | Flatfish |
| REINHARDTIUS HIPPOGLOSSOIDES | Flatfish |
| RHACHOTROPIS | Hyperiids |
| RHACHOTROPIS ACULEATA | Hyperiids |
| RHACHOTROPIS MACROPUS | Hyperiids |
| RHODOPHYCEAE | Other food |
| RHODOPHYTA | Other food |
| ROCK/STONES | NA |
| ROSSIA | Other food |
| ROSSIA GLAUCOPIS | Other food |
| SABELLIDAE | Other food |
| SABINEA | Euphausiids |
| SABINEA SARSII | Euphausiids |
| SABINEA SEPTEMCARINATA | Other food |
| SADURIA | Other food |
| SADURIA SABINI | Other food |
| SAGITTA (PARASAGITTA) ELEGANS | Other food |
| SALMO SALAR | Other fish |
| SALMONIDAE | Other fish |
| SALMONIFORMES | Other fish |
| SALPIDA | Other food |
| SAND | NA |
| SARCODINA | Other food |
| SARS SHRIMP | Euphausiids |
| SCAPHOPODA | Other food |
| SCINA BOREALIS | Hyperiids |
| SCLERACTINIA | Other food |
| SCLEROCRANGON | Shrimp |
| SCLEROCRANGON BOREAS | Shrimp |
| SCLEROCRANGON FEROX | Shrimp |
| SCOMBER | Other fish |
| SCOMBER SCOMBRUS | Other fish |
| SCOPHTHALMUS | Flatfish |
| SCORPAENIDAE | Other fish |
| SCORPAENIFORMES | Other fish |
| SCYLLARIDAE | Other food |
| SCYPHOZOA | Other food |
| SEBASTES | Redfish |
| SEBASTES MARINUS | Redfish |
| SEBASTES MENTELLA | Redfish |
| SEBASTES NORVEGICUS | Redfish |
| SEBASTES VIVIPARUS | Redfish |
| SEPIIDA | Other food |
| SEPIOLA ATLANTICA | Other food |
| SEPIOLIDAE | Other food |
| SERGESTES | Euphausiids |
| SERGESTES ARCTICUS | Euphausiids |
| SERGESTIDAE | Euphausiids |
| SERRIPES GROENLANDICUS | Other food |
| SERTELLA BEANIANA | Other food |
| SERTULARIIDAE | Other food |
| SIPHONOPHORA | Other food |
| SIPUNCULA | Other food |
| SIPUNCULIDAE | Other food |
| SPHAEROMATIDAE | Other food |
| SPIOCHAETOPTERUS TYPICUS | Other food |
| SPIRONTOCARIS | Euphausiids |
| SPIRONTOCARIS LILJEBORGII | Euphausiids |
| SPIRONTOCARIS LILLJEBORGII | Euphausiids |
| SPIRONTOCARIS SPINUS | Euphausiids |
| SPIRONTOCARIS spp | Euphausiids |
| SPIRONTOCARIS SPP | Euphausiids |
| STEGOCEPHALIDAE | Hyperiids |
| STEGOCEPHALUS | Hyperiids |
| STEGOCEPHALUS INFLATUS | Hyperiids |
| STENOGLOSSA | Hyperiids |
| STICHAEIDAE | Other fish |
| STROMATEOIDEI | Other fish |
| STRONGYLOCENTROTUS | Other fish |
| STRONGYLOCENTROTUS DROBACHIENSIS | Other food |
| STYLEPHORUS | Other fish |
| SYNGNATHIDAE | Other fish |
| SYNGNATHOIDEI | Other fish |
| SYRRHOE CRENULATA | Other food |
| SYSCENUS SPP | Shrimp |
| TANAIDACEA | Euphausiids |
| TANAIDAE | Euphausiids |
| TAURULUS BUBALIS | Other fish |
| TEALIA FELINA | Other food |
| TELEOSTEI | Other fish |
| TEMORA LONGICORNIS | Other food |
| TEMORIDAE | Other food |
| TEREBELLIDAE | Other food |
| TEUTHIDA | Other food |
| THALIACEA | Other food |
| THEMISTO | Hyperiids |
| THEMISTO ABYSSORUM | Hyperiids |
| THEMISTO COMPRESSA | Hyperiids |
| THEMISTO LIBELLULA | Hyperiids |
| THYONIDIUM | Other food |
| THYSANOESSA | Euphausiids |
| THYSANOESSA INERMIS | Euphausiids |
| THYSANOESSA LONGICAUDATA | Euphausiids |
| THYSANOESSA RASCHII | Euphausiids |
| TISBE FURCATA | Other food |
| TMETONYX | Other food |
| TODARODES SAGITTATUS | Other food |
| TORPEDINIDAE | Other food |
| TREMATODA | Other food |
| TRIGLA SPP | Small arctic fish |
| TRIGLIDAE | Other fish |
| TRIGLOPS | Small arctic fish |
| TRIGLOPS MURRAYI | Small arctic fish |
| TRIGLOPS NYBELINI | Small arctic fish |
| TRIGLOPS PINGELII | Small arctic fish |
| TRISOPTERUS | Codfishes |
| TRISOPTERUS ESMARKI | Codfishes |
| TRISOPTERUS MINUTUS | Codfishes |
| TROCHIDAE | Other food |
| TUBEWORMS | Other food |
| TUNICATA | Other food |
| TURRITELLA COMMUNIS | Other food |
| ULCINA OLRIKII | Other food |
| UNREADABLE | NA |
| VALVIFERA | Other food |
| VARIATUS PISCES | Other fish |
| VENEROIDA | Other food |
| VENUS SPP | Other food |
| XANTHOPHYTA | Other food |
| YOLDIELLA | Other food |
| ZEUGOPTERUS NORVEGICUS | Flatfish |
| ZOARCIDAE | Other fish |
| ZOARCOIDEI | Other fish |
| (other) | NA |
| (Other) | NA |
